# Supplementary material for: Functional classification of DDOST variants of uncertain clinical significance in congenital disorders of glycosylation
Source: PubMed Central journal article supplement (PMC10582084; doi:10.1038/s41598-023-42178-y), 2023-10-17

# **Functional Classification of *DDOST* Variants of Uncertain Clinical Significance in Congenital Disorders of Glycosylation**

Sjors M. Kas, Piyushkumar A. Mundra, Duncan L. Smith, Richard Marais

## **Supplementary Information (SI)**

### **The original images of the western blots used in this study.**

This document contains all the uncropped western blots that are presented in the manuscript. The membranes were captured using the Li-COR Odyssey CLx Infrared Imaging System using a 700 nm (shown in red) and 800 nm (green) channel, which enabled the detection of proteins with similar molecular weight on a single membrane. The white rectangles mark the cropped images that are shown in the manuscript. A few membranes were reprobbed with new antibodies after the first round of incubations.

**Fig. 2c**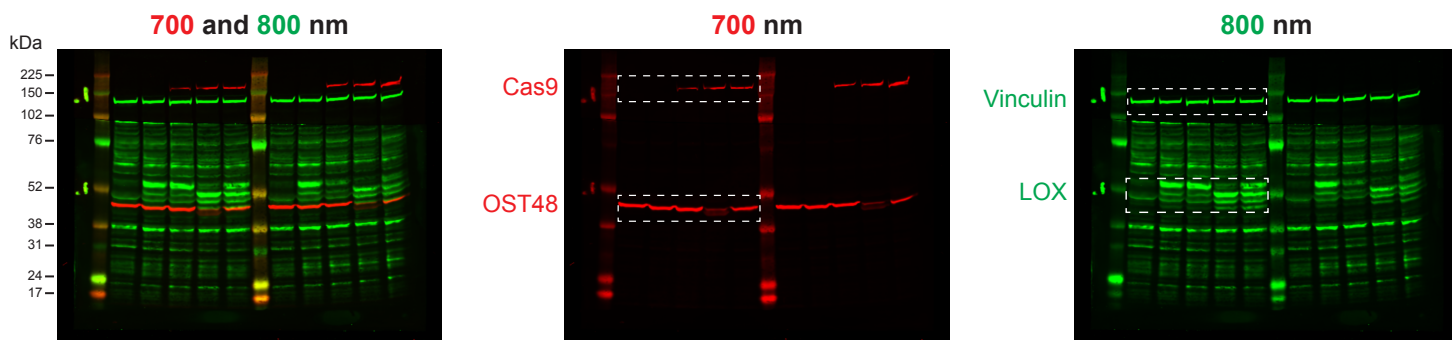**Fig. 2d**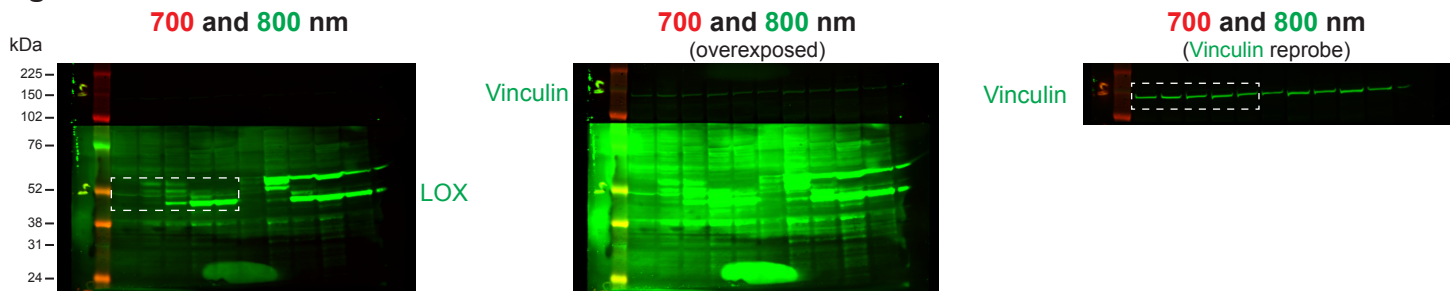**Fig. 2e**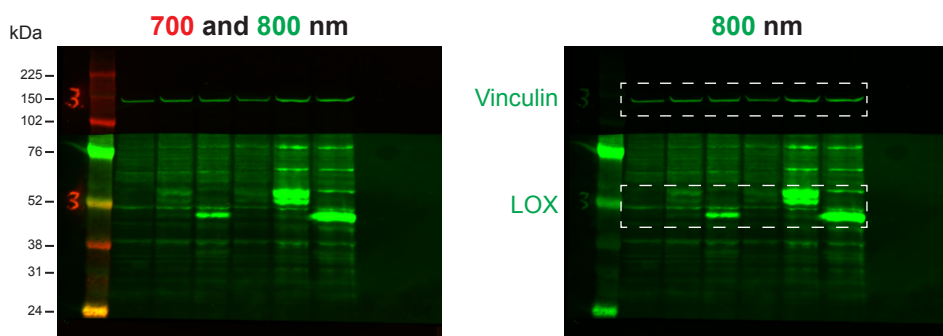**Fig. 3b**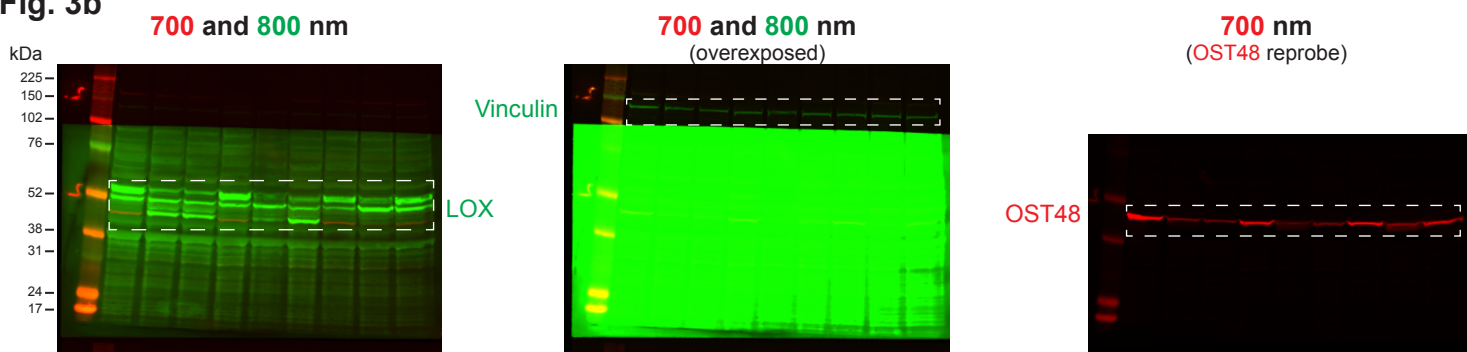**Fig. 4a**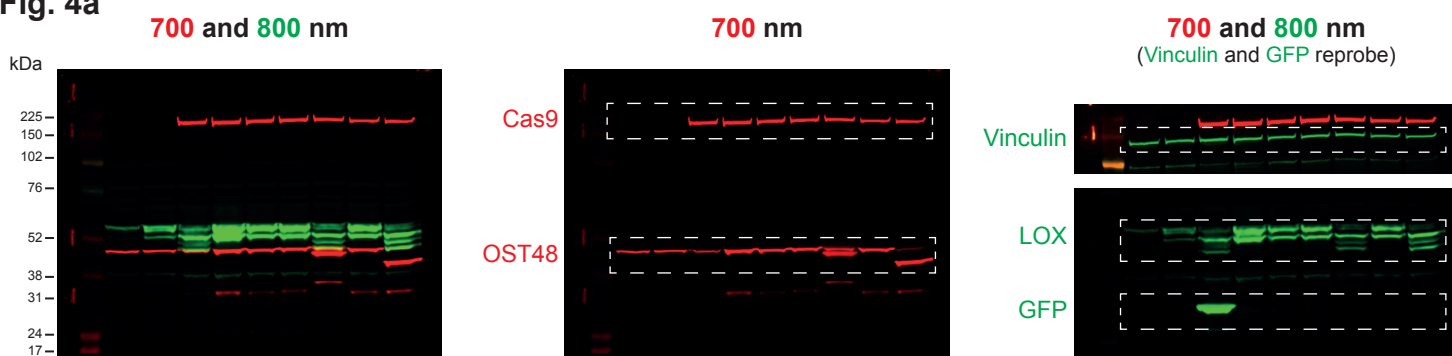

**Fig. 4e**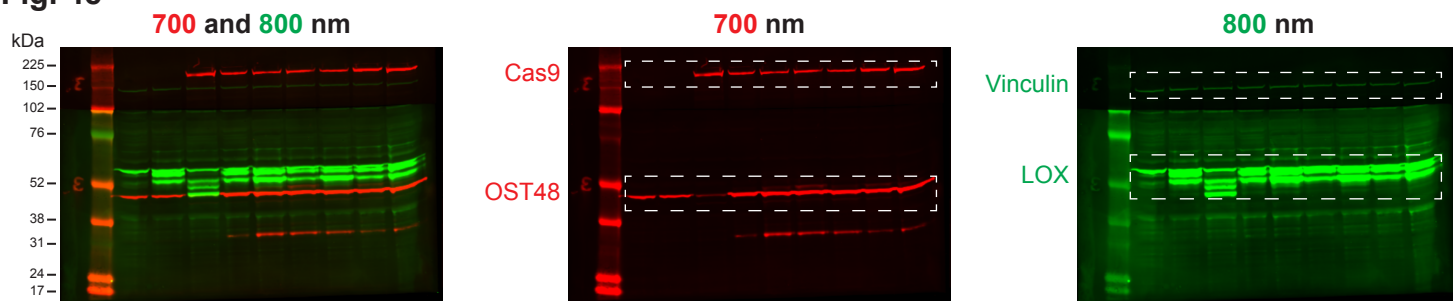**Fig. 4f**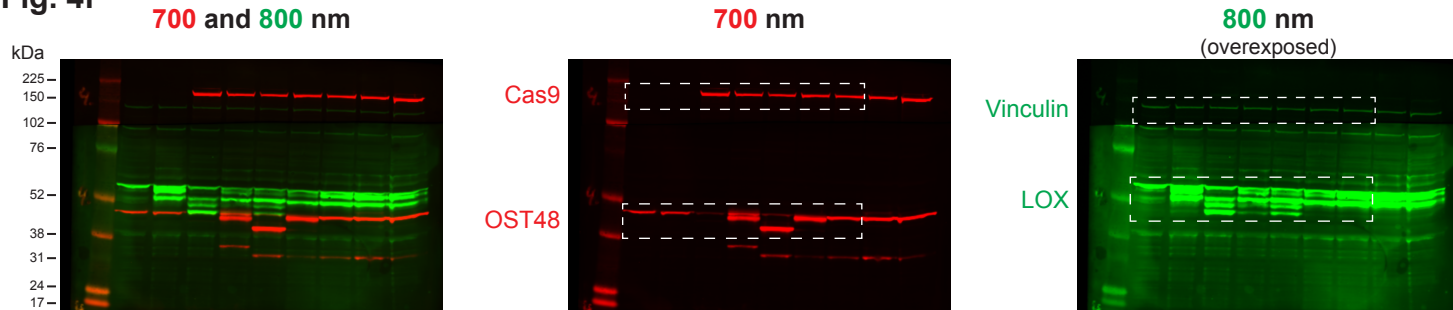**Fig. 5: Top left**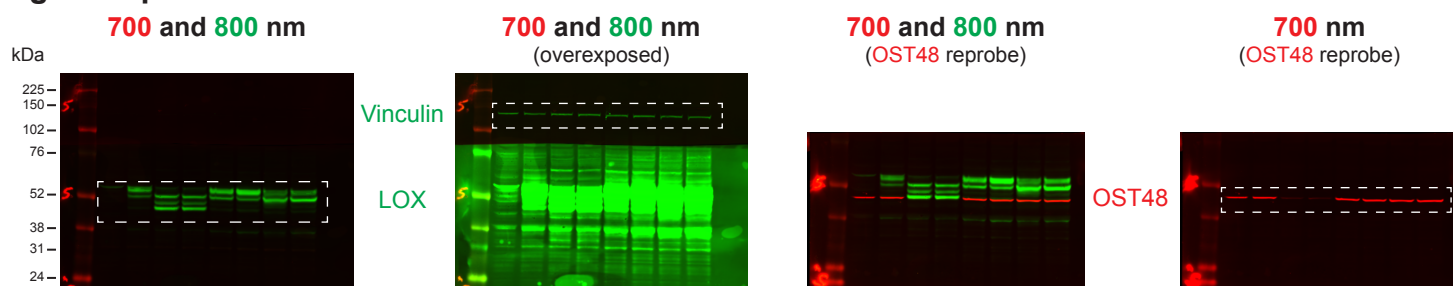**Fig. 5: Top right**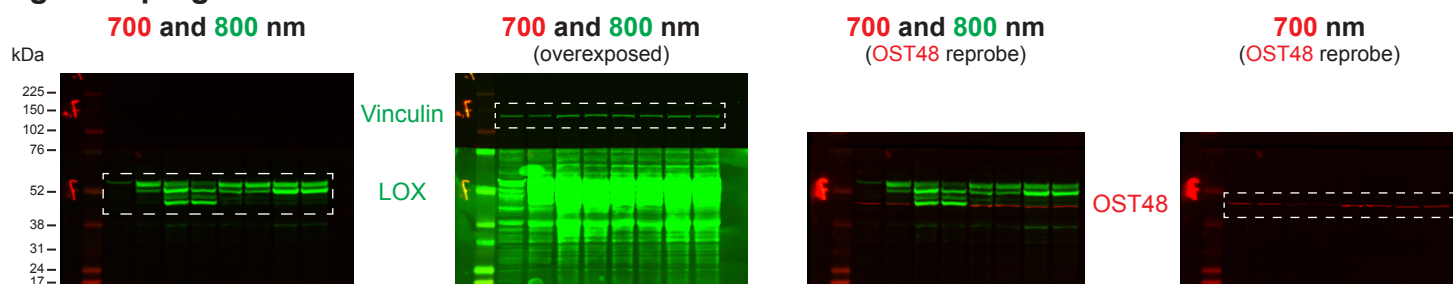**Fig. 5: Bottom left**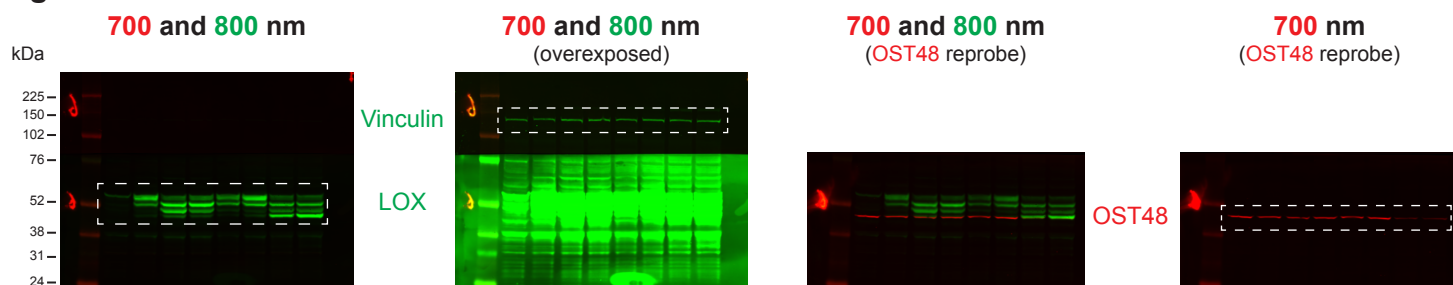**Fig. 5: Bottom right**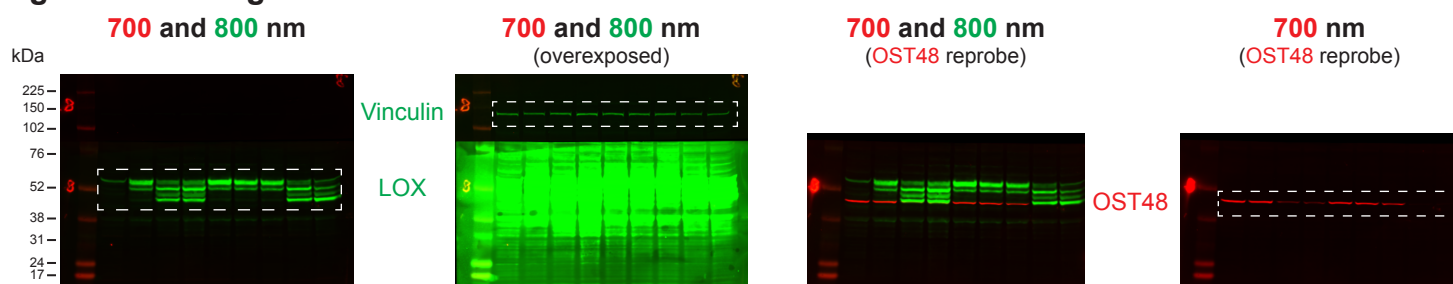

### Supplementary Fig. 2a

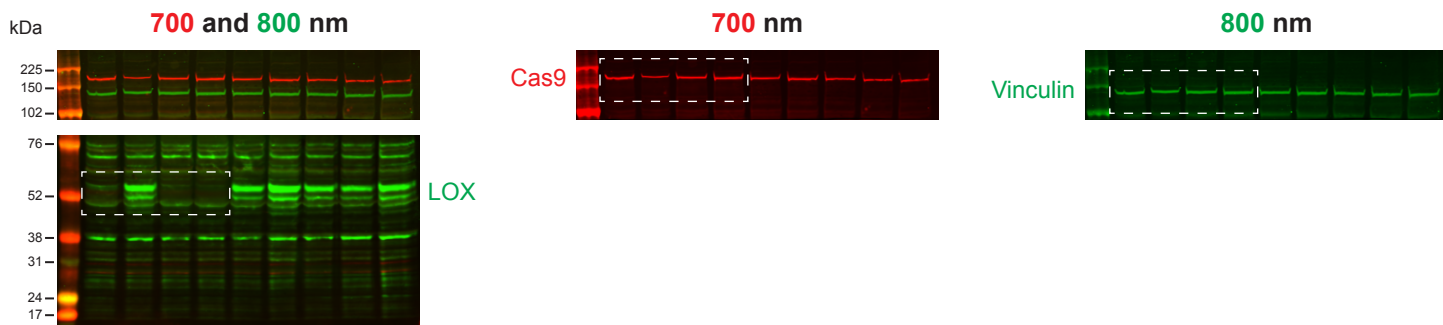

### Supplementary Fig. 2b

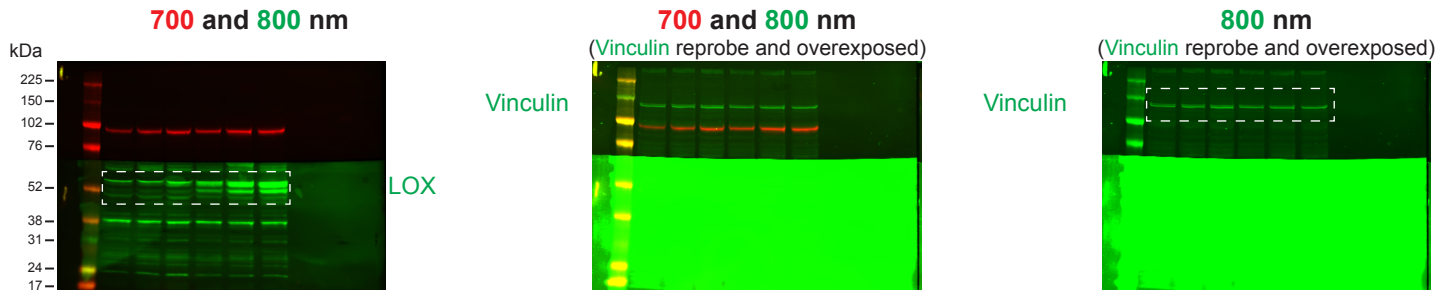

### Supplementary Fig. 2c

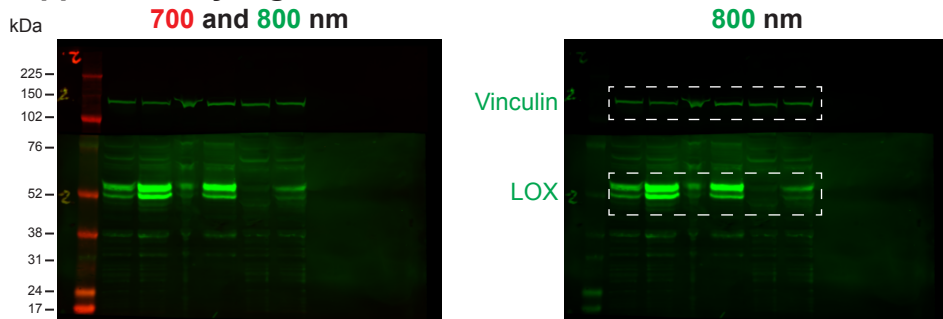

### Supplementary Fig. 2d

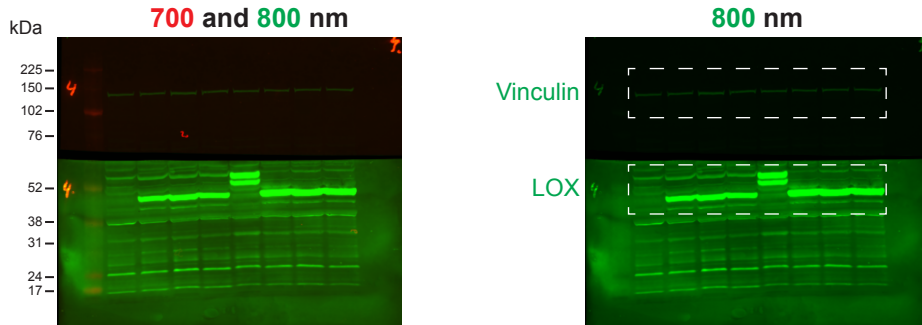

### Supplementary Fig. 3b: MDA-MB-231

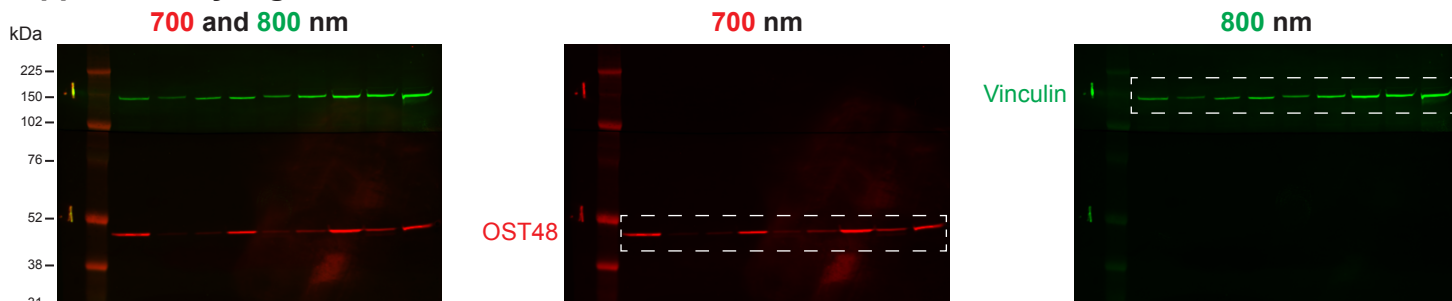

### Supplementary Fig. 3b: U87

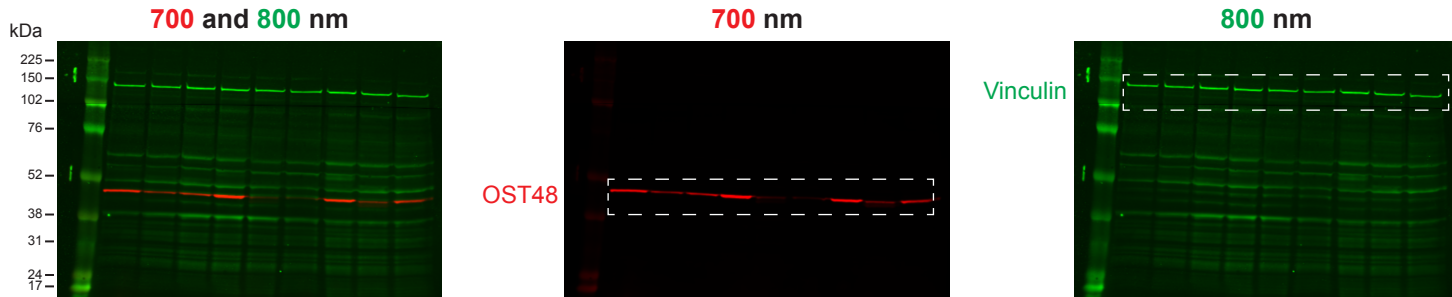

### Supplementary Fig. 4a

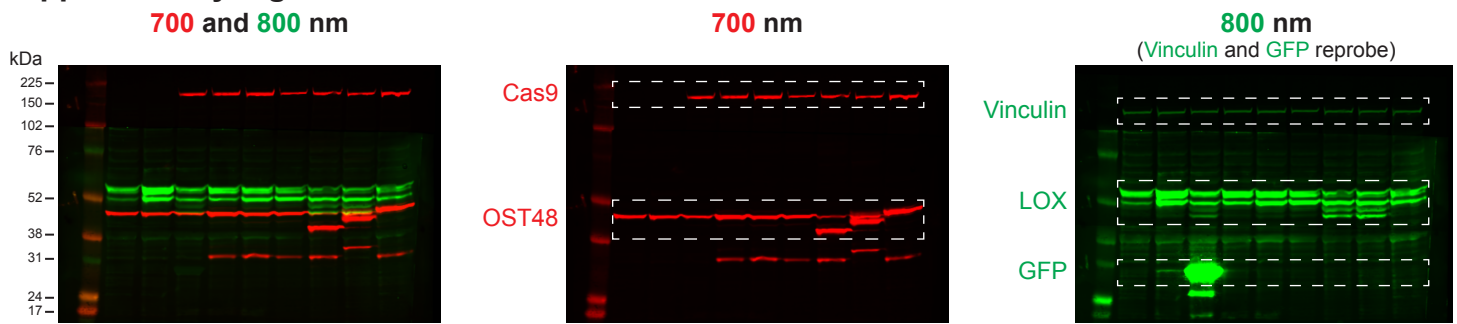

### Supplementary Fig. 5a: Top left

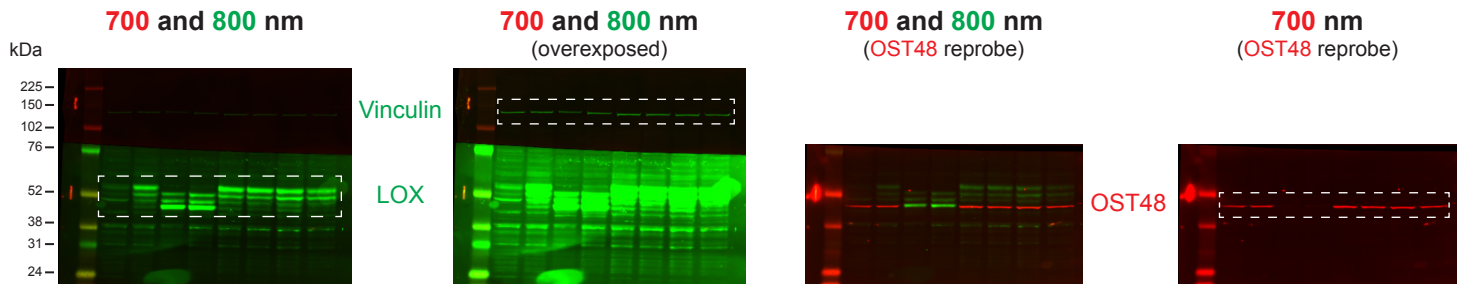

### Supplementary Fig. 5a: Top right

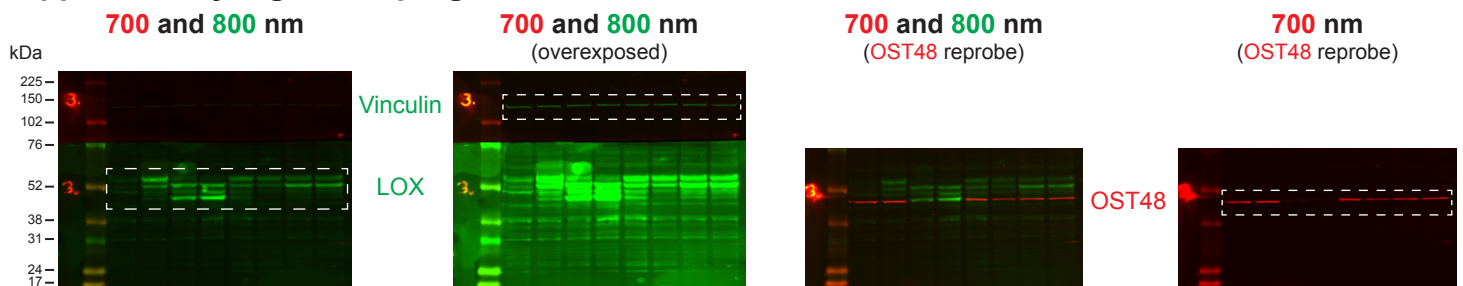

### Supplementary Fig. 5a: Bottom left

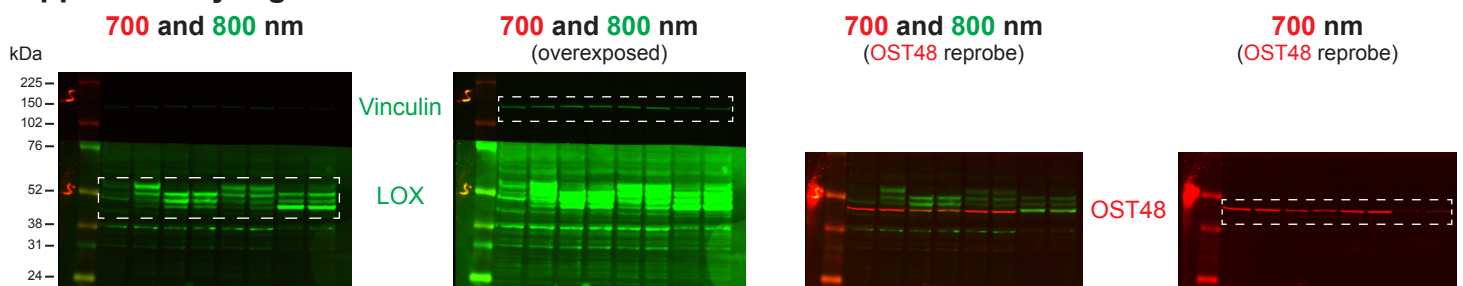

### Supplementary Fig. 5a: Bottom right

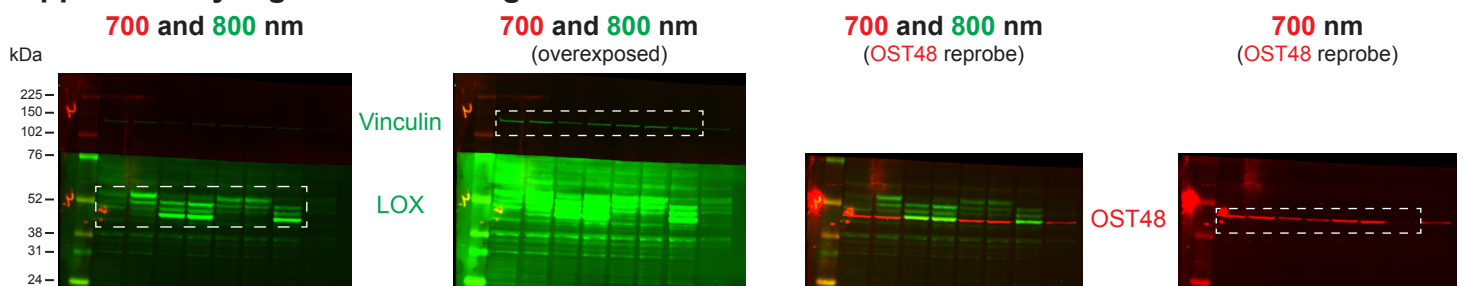

**Supplementary Fig. 5b**

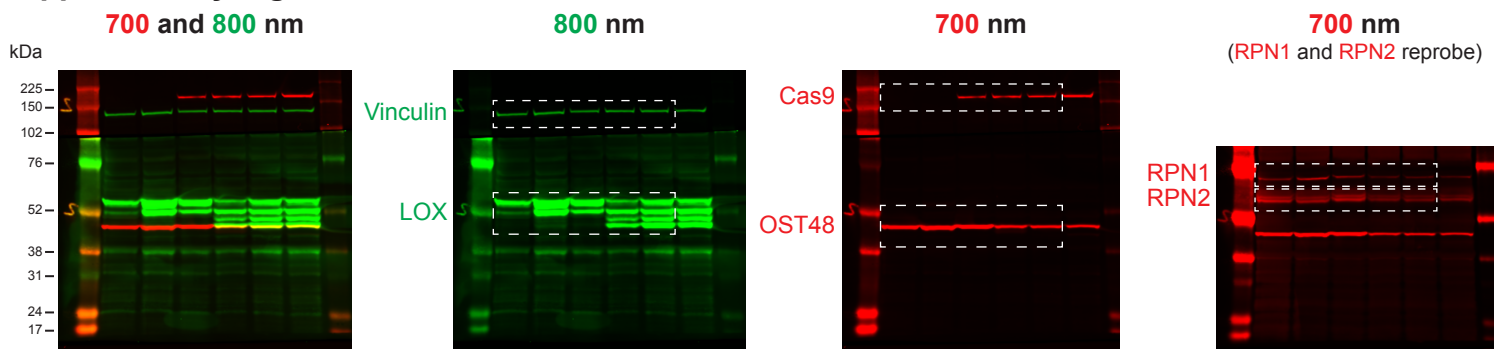

**Supplementary Fig. 5c**

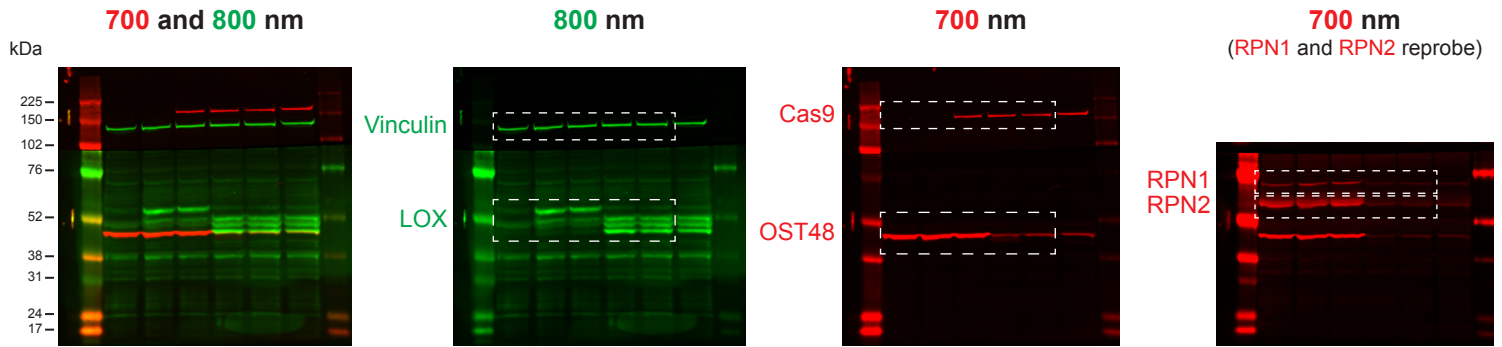

Supplement: 41598_2023_42178_MOESM1_ESM.pdf [file 41598_2023_42178_MOESM1_ESM.pdf]
